# Supplementary material for: Diagnostic value of microRNA panel in endometrial cancer: A systematic review
Source: PubMed Central journal article supplement (PMC7260115; doi:10.18632/oncotarget.27601), 2020-05-26
Supplement: oncotarget-11-2010-s001.pdf [file oncotarget-11-2010-s001.pdf]

## **Diagnostic value of microRNA panel in endometrial cancer: A systematic review**

### **SUPPLEMENTARY MATERIALS**

**Supplementary Table 1: The main characteristics of included studies.** See Supplementary Table 1

**Supplementary Table 2: Up-regulated miRNAs in tissue samples**

| miRNA       | Number of studies | Sample size EC | Sample size control | Mean fold change** | Studies with fold change reported |
|-------------|-------------------|----------------|---------------------|--------------------|-----------------------------------|
| miR-205     | 10                | 134            | 63                  | 198.08             | 4                                 |
| miR-200c    | 7                 | 126            | 55                  | 27.99              | 4                                 |
| miR-182     | 5                 | 141            | 79                  | 11.41              | 3                                 |
| miR-183     | 5                 | 141            | 79                  | 8.75               | 2                                 |
| miR-200a    | 5                 | 121            | 75                  | 5.20               | 4                                 |
| miR-135b    | 3                 | 96             | 35                  | 35.59              | 2                                 |
| miR-429     | 3                 | 117            | 61                  | 6.83               | 3                                 |
| miR-200b    | 3                 | 103            | 51                  | 3.86               | 2                                 |
| miR-200a*   | 2                 | 73             | 31                  | 26.96              | 1                                 |
| miR-141-3p  | 2                 | 65             | 30                  | 22.95              | 2                                 |
| miR-200b*   | 2                 | 73             | 31                  | 6.52               | 1                                 |
| miR-223     | 2                 | 38             | 28                  | 4.9                | 1                                 |
| miR-141     | 2                 | 30             | 20                  | 4.70               | 1                                 |
| miR-106a    | 2                 | 68             | 48                  | 2.80               | 2                                 |
| miR-135a    | 1                 | 23             | 4                   | 34.05              | 1                                 |
| miR-205-5p  | 1                 | 16             | 24                  | 31.52              | 1                                 |
| miR-200b-3p | 1                 | 16             | 24                  | 27.68              | 1                                 |
| miR-182-5p  | 1                 | 16             | 24                  | 27.30              | 1                                 |
| miR-200c-3p | 1                 | 16             | 24                  | 24.40              | 1                                 |
| miR-92a     | 1                 | 39             | 17                  | 15.63              | 1                                 |
| miR-9-5p    | 1                 | 16             | 34                  | 15.05              | 1                                 |
| miR-9       | 1                 | 73             | 31                  | 5.46               | 1                                 |
| miR-210     | 1                 | 38             | 28                  | 5.23               | 1                                 |
| miR-96      | 1                 | 73             | 31                  | 4.27               | 1                                 |
| miR-194     | 1                 | 38             | 28                  | 4.11               | 1                                 |
| miR-95      | 1                 | 38             | 28                  | 4.09               | 1                                 |
| miR-155     | 1                 | 38             | 28                  | 3.87               | 1                                 |
| miR-18a*    | 1                 | 30             | 20                  | 3.65               | 1                                 |
| miR-96-5p   | 1                 | 49             | 6                   | 3.20               | 1                                 |
| miR-103     | 1                 | 38             | 28                  | 3.00               | 1                                 |
| miR-151     | 1                 | 38             | 28                  | 2.85               | 1                                 |
| miR-34a     | 1                 | 30             | 20                  | 2.63               | 1                                 |
| miR-92a-1*  | 1                 | 30             | 20                  | 2.47               | 1                                 |
| miR-20a*    | 1                 | 30             | 20                  | 2.34               | 1                                 |
| miR-106b*   | 1                 | 30             | 20                  | 2.34               | 1                                 |
| miR-17*     | 1                 | 30             | 20                  | 1.99               | 1                                 |
| miR-185     | 1                 | 30             | 20                  | 1.85               | 1                                 |
| miR-222-3p  | 1                 | 16             | 24                  | 1.80               | 1                                 |
| miR-146     | 1                 | 141            | 20                  | NR                 | 0                                 |
| miR-425     | 1                 | 141            | 20                  | NR                 | 0                                 |
| miR-944     | 1                 | 68             | 20                  | NR                 | 0                                 |
| miR-15b     | 1                 | 67             | 15                  | NR                 | 0                                 |
| miR-16      | 1                 | 67             | 15                  | NR                 | 0                                 |
| miR-128a    | 1                 | 67             | 15                  | NR                 | 0                                 |
| miR-148b    | 1                 | 67             | 15                  | NR                 | 0                                 |
| miR-196a    | 1                 | 67             | 15                  | NR                 | 0                                 |
| miR-301     | 1                 | 67             | 15                  | NR                 | 0                                 |
| miR-582-5p  | 1                 | 67             | 15                  | NR                 | 0                                 |
| miR-499     | 1                 | 28             | 14                  | NR                 | 0                                 |

NR = not reported, \*\*mean fold change as found by qRT-PCR.

**Supplementary Table 3: Up-regulated miRNAs in serum/plasma samples**

| MiRNA      | Number of studies | Sample size EC | Sample size control | Mean fold change** | Studies with fold change reported |
|------------|-------------------|----------------|---------------------|--------------------|-----------------------------------|
| miR-223    | 3                 | 66             | 71                  | 57.81              | 2                                 |
| miR-222    | 2                 | 26             | 22                  | 19.16              | 1                                 |
| miR-186    | 2                 | 26             | 22                  | 11.39              | 1                                 |
| miR-203    | 2                 | 79             | 44                  | NR                 | 0                                 |
| miR-15b    | 1                 | 40             | 49                  | 6.10               | 1                                 |
| miR-204    | 1                 | 26             | 22                  | 5.79               | 1                                 |
| miR-27a    | 1                 | 40             | 49                  | 5.63               | 1                                 |
| miR-199b   | 1                 | 34             | 14                  | 2.89               | 1                                 |
| miR-887-5p | 1                 | 50             | 50                  | 2.41               | 1                                 |
| miR-99a    | 1                 | 34             | 14                  | 1.96               | 1                                 |
| miR-100    | 1                 | 34             | 14                  | 1.65               | 1                                 |
| miR-200a   | 1                 | 34             | 14                  | NR                 | 0                                 |
| miR-141    | 1                 | 34             | 14                  | NR                 | 0                                 |
| miR-92a    | 1                 | 34             | 14                  | NR                 | 0                                 |
| miR-449a   | 1                 | 34             | 14                  | NR                 | 0                                 |
| miR-1228   | 1                 | 34             | 14                  | NR                 | 0                                 |
| miR-1290   | 1                 | 34             | 14                  | NR                 | 0                                 |
| miR-205    | 1                 | 12             | 12                  | NR                 | 0                                 |
| miR-135b   | 1                 | 12             | 12                  | NR                 | 0                                 |

NR = not reported, \*\*mean fold change as found by qRT-PCR.

**Supplementary Table 4: Up-regulated miRNAs in urine samples**

| MiRNA       | Number of studies | Sample size EC | Sample size control | Mean fold change** | Studies with fold change reported |
|-------------|-------------------|----------------|---------------------|--------------------|-----------------------------------|
| miR-200c-3p | 1                 | 22             | 5                   | NR                 | 0                                 |

NR = not reported, \*\*mean fold change as found by qRT-PCR.

**Supplementary Table 5: Up-regulated miRNAs in LBC samples**

| MiRNA       | Number of studies | Sample size EC | Sample size control | Mean fold change** | Studies with fold change reported |
|-------------|-------------------|----------------|---------------------|--------------------|-----------------------------------|
| miR-182-5p  | 1                 | 12             | 28                  | 18.21              | 1                                 |
| miR-205-5p  | 1                 | 12             | 28                  | 16.85              | 1                                 |
| miR-141-3p  | 1                 | 12             | 28                  | 11.45              | 1                                 |
| miR-200c-3p | 1                 | 12             | 28                  | 6.27               | 1                                 |
| miR-200b-3p | 1                 | 12             | 28                  | 4.69               | 1                                 |
| miR-222-3p  | 1                 | 12             | 28                  | 3.43               | 1                                 |

NR = not reported, \*\*mean fold change as found by qRT-PCR.

**Supplementary Table 6: Down-regulated miRNAs in tissue samples**

| miRNA       | Number of studies | Sample size EC | Sample size control | Mean fold change** | Studies with fold change reported |
|-------------|-------------------|----------------|---------------------|--------------------|-----------------------------------|
| miR-137     | 1                 | 23             | 4                   | 115.15             | 1                                 |
| miR-129-3p  | 1                 | 23             | 4                   | 42.30              | 1                                 |
| miR-410     | 1                 | 73             | 31                  | 13.91              | 1                                 |
| miR-503     | 1                 | 14             | 10                  | 8.60               | 1                                 |
| miR-1247    | 1                 | 30             | 20                  | 5.31               | 1                                 |
| miR-376c    | 1                 | 30             | 20                  | 3.64               | 1                                 |
| miR-199b    | 1                 | 73             | 31                  | 3.52               | 1                                 |
| miR-377     | 1                 | 30             | 20                  | 3.34               | 1                                 |
| miR-99a     | 1                 | 73             | 31                  | 3.29               | 1                                 |
| miR-26a-5p  | 1                 | 49             | 6                   | 3.10               | 1                                 |
| miR-214     | 1                 | 30             | 20                  | 2.90               | 1                                 |
| miR-150-5p  | 1                 | 49             | 6                   | 2.70               | 1                                 |
| miR-370     | 1                 | 30             | 20                  | 2.68               | 1                                 |
| let-7f-5p   | 1                 | 49             | 6                   | 2.60               | 1                                 |
| miR-26b-5p  | 1                 | 49             | 6                   | 2.60               | 1                                 |
| miR-100     | 1                 | 73             | 31                  | 2.56               | 1                                 |
| let-7c-5p   | 1                 | 49             | 6                   | 2.50               | 1                                 |
| miR-23b-3p  | 1                 | 49             | 6                   | 2.40               | 1                                 |
| miR-125b-5p | 1                 | 49             | 6                   | 2.30               | 1                                 |
| miR-126-3p  | 1                 | 49             | 6                   | 2.30               | 1                                 |
| miR-195-5p  | 1                 | 49             | 6                   | 2.20               | 1                                 |
| miR-424-5p  | 1                 | 49             | 6                   | 2.20               | 1                                 |
| miR-374a-5p | 1                 | 49             | 6                   | 2.10               | 1                                 |
| let-7a-5p   | 1                 | 49             | 6                   | 2.00               | 1                                 |
| let-7e-5p   | 1                 | 49             | 6                   | 2.00               | 1                                 |
| miR-125a-5p | 1                 | 49             | 6                   | 2.00               | 1                                 |
| miR-542-5p  | 1                 | 14             | 10                  | 2.00               | 1                                 |
| miR-337-5p  | 1                 | 30             | 20                  | 1.94               | 1                                 |
| miR-1305    | 1                 | 73             | 31                  | 1.77               | 1                                 |
| miR-758     | 1                 | 30             | 20                  | 1.61               | 1                                 |
| miR-300     | 1                 | 30             | 20                  | 1.56               | 1                                 |
| miR-125     | 1                 | 67             | 15                  | NR                 | 0                                 |
| miR-34      | 1                 | 67             | 15                  | NR                 | 0                                 |
| miR-30a-3p  | 1                 | 28             | 14                  | NR                 | 0                                 |
| miR-10b     | 1                 | 28             | 14                  | NR                 | 0                                 |
| miR-195     | 1                 | 28             | 14                  | NR                 | 0                                 |
| miR-30a-5p  | 1                 | 28             | 14                  | NR                 | 0                                 |
| miR-101     | 1                 | 21             | 7                   | NR                 | 0                                 |
| miR-10b*    | 1                 | 21             | 7                   | NR                 | 0                                 |
| miR-133a    | 1                 | 21             | 7                   | NR                 | 0                                 |
| miR-133b    | 1                 | 21             | 7                   | NR                 | 0                                 |
| miR-152     | 1                 | 21             | 7                   | NR                 | 1                                 |
| miR-29b     | 1                 | 21             | 7                   | NR                 | 0                                 |
| miR-34b     | 1                 | 21             | 7                   | NR                 | 0                                 |
| miR-411     | 1                 | 21             | 7                   | NR                 | 0                                 |

NR = not reported, \*\*mean fold change as found by qRT-PCR.

**Supplementary Table 7: Down-regulated miRNAs in serum/plasma samples**

| MiRNA      | Number of studies | Sample size EC | Sample size control | Mean fold change** | Studies with fold change reported |
|------------|-------------------|----------------|---------------------|--------------------|-----------------------------------|
| miR-93     | 1                 | 176            | 100                 | NR                 | 0                                 |
| miR-204    | 1                 | 46             | 28                  | NR                 | 0                                 |
| miR-30a-3p | 1                 | 40             | 26                  | NR                 | 0                                 |
| miR-9      | 1                 | 34             | 14                  | NR                 | 0                                 |
| miR-301b   | 1                 | 34             | 14                  | NR                 | 0                                 |
| miR-21     | 1                 | 12             | 12                  | NR                 | 0                                 |

NR = not reported, \*\*mean fold change as found by qRT-PCR.

**Supplementary Table 8: MiRNAs with inconsistent direction of change in tissue**

| MiRNA   | Number of studies | Up/down-regulation | Sample size EC | Sample size control | Mean fold change** | Studies with fold change reported |
|---------|-------------------|--------------------|----------------|---------------------|--------------------|-----------------------------------|
| miR-203 | 2                 | Up                 | 111            | 59                  | 4.19               | 2                                 |
|         | 1                 | Down               | 60             | 10                  | 0.073              | 1                                 |
| miR-21  | 1                 | Up                 | 67             | 15                  | NR                 | 0                                 |
|         | 1                 | Down               | 28             | 14                  | NR                 | 0                                 |

NR = not reported, \*\*mean fold change as found by qRT-PCR.

**Supplementary Table 9: MiRNAs with inconsistent direction of change in plasma/serum**

| MiRNA   | Number of studies | Up/down-regulation | Sample size EC | Sample size control | Mean fold change** | Studies with fold change reported |
|---------|-------------------|--------------------|----------------|---------------------|--------------------|-----------------------------------|
| MiR-204 | 1                 | Up                 | 26             | 22                  | 5.79               | 1                                 |
|         | 1                 | Down               | 46             | 28                  | NR                 | 0                                 |

NR = not reported, \*\*mean fold change as found by qRT-PCR.
